# Supplementary material
Source: PubMed Central journal article supplement (PMC3347427)
Supplement: supp_80.5.1699_IAI-IAI06308-11-s01.pdf [file supp_80.5.1699_IAI-IAI06308-11-s01.pdf]

| Trivial name           | Presentatio<br>n | Glycans                                                                                         | Co.        | Cat#                          |
|------------------------|------------------|-------------------------------------------------------------------------------------------------|------------|-------------------------------|
| $\alpha$ Fuc           | PAA              | Fuc $\alpha$ 1-PAA                                                                              | Glycotech  | 01-007                        |
| Fuc $\alpha$ 2Gal      | PAA              | Fuc $\alpha$ 1-2Gal $\beta$ 1-PAA                                                               | Glycotech  | 01-019                        |
| Fuc $\alpha$ 3GlcNAc   | PAA              | Fuc $\alpha$ 1-3GlcNAc $\beta$ 1-PAA                                                            | Glycotech  | 01-024                        |
| Fuc $\alpha$ 4GlcNAc   | PAA              | Fuc $\alpha$ 1-4GlcNAc $\beta$ 1-PAA                                                            | Glycotech  | 01-025                        |
| H type1                | PAA              | Fuc $\alpha$ 1-2Gal $\beta$ 1-3GlcNAc $\beta$ 1-PAA                                             | Glycotech  | 01-037                        |
| H type2                | PAA              | Fuc $\alpha$ 1-2Gal $\beta$ 1-4GlcNAc $\beta$ 1-PAA                                             | Glycotech  | 08-034                        |
| H type3                | PAA              | Fuc $\alpha$ 1-2Gal $\beta$ 1-3GalNAc $\beta$ 1-PAA                                             | Glycotech  | 08-060                        |
| A                      | PAA              | GalNAc $\alpha$ 1-3(Fuc $\alpha$ 1-2)Gal $\beta$ 1-4GlcNAc $\beta$ 1-PAA                        | Glycotech  | 08-091                        |
| B                      | PAA              | Gal $\alpha$ 1-3(Fuc $\alpha$ 1-2)Gal $\beta$ 1-4GlcNAc $\beta$ 1-PAA                           | Glycotech  | 08-092                        |
| Le <sup>a</sup>        | PAA              | Gal $\beta$ 1-3(Fuc $\alpha$ 1-4)GlcNAc $\beta$ 1-PAA                                           | Glycotech  | 01-035                        |
| [3S]Le <sup>a</sup>    | PAA              | (3OSO <sub>2</sub> )Gal $\beta$ 1-3(Fuc $\alpha$ 1-4)GlcNAc $\beta$ 1-PAA                       | Glycotech  | 01-040                        |
| Le <sup>b</sup>        | PAA              | Fuc $\alpha$ 1-2Gal $\beta$ 1-3(Fuc $\alpha$ 1-3)GlcNAc $\beta$ 1-PAA                           | Glycotech  | 08-042                        |
| Le <sup>c</sup>        | PAA              | Gal $\beta$ 1-4(Fuc $\alpha$ 1-3)GlcNAc $\beta$ 1-PAA                                           | Glycotech  | 01-036                        |
| Le <sup>d</sup>        | PAA              | Fuc $\alpha$ 1-2Gal $\beta$ 1-4(Fuc $\alpha$ 1-3)GlcNAc $\beta$ 1-PAA                           | Glycotech  | 08-043                        |
| $\alpha$ Neu5Ac        | PAA              | Neu5Ac $\alpha$ 2-PAA                                                                           | Glycotech  | 01-012                        |
| $\alpha$ Neu5Gc        | PAA              | Neu5Gc $\alpha$ 2-PAA                                                                           | Glycotech  | 01-051                        |
| Sia2                   | PAA              | Neu5Ac $\alpha$ 2-8Neu5Ac $\alpha$ 2-PAA                                                        | Glycotech  | 08-064                        |
| Sia3                   | PAA              | Neu5Ac $\alpha$ 2-8Neu5Ac $\alpha$ 2-8Neu5Ac $\alpha$ 2-PAA                                     | Glycotech  | 01-081                        |
| 3'Siale <sup>a</sup>   | PAA              | Neu5Ac $\alpha$ 2-3Gal $\beta$ 1-3GlcNAc $\beta$ 1-PAA                                          | Glycotech  | 01-078                        |
| 3'SL                   | PAA              | Neu5Ac $\alpha$ 2-3Gal $\beta$ 1-4Glc $\beta$ 1-PAA                                             | Glycotech  | 01-038                        |
| 3'SLN                  | PAA              | Neu5Ac $\alpha$ 2-3Gal $\beta$ 1-4GlcNAc $\beta$ 1-PAA                                          | Glycotech  | 01-077                        |
| sLe <sup>a</sup>       | PAA              | Neu5Ac $\alpha$ 2-3Gal $\beta$ 1-3(Fuc $\alpha$ 1-4)GlcNAc $\beta$ 1-PAA                        | Glycotech  | 08-044                        |
| sLe <sup>b</sup>       | PAA              | Neu5Ac $\alpha$ 2-3Gal $\beta$ 1-4(Fuc $\alpha$ 1-3)GlcNAc $\beta$ 1-PAA                        | Glycotech  | 01-045                        |
| 6'SL                   | PAA              | Neu5Ac $\alpha$ 2-6Gal $\beta$ 1-4Glc $\beta$ 1-PAA                                             | Glycotech  | 01-039                        |
| FET                    | Glycoprotein     | Fetuin (Complex-type N-glycans and O-glycans)                                                   | Sigma      | F3004                         |
| AGP                    | Glycoprotein     | $\alpha$ 1-acid glycoprotein (Complex-type N-glycans)                                           | Sigma      | G9885                         |
| TF                     | Glycoprotein     | Transferrin (Complex-type N-glycans)                                                            | Sigma      | T3309                         |
| TG                     | Glycoprotein     | Porcine thyroglobulin (Complex and high-mannose-type N-glycans)                                 | Sigma      | T1126                         |
| $\beta$ Gal            | PAA              | Gal $\beta$ 1-PAA                                                                               | Glycotech  | 01-004                        |
| [3S] $\beta$ Gal       | PAA              | (3OSO <sub>2</sub> )Gal $\beta$ 1-PAA                                                           | Glycotech  | 01-015                        |
| A-di                   | PAA              | GalNAc $\alpha$ 1-3Gal $\beta$ 1-PAA                                                            | Glycotech  | 01-017                        |
| Lac                    | PAA              | Gal $\beta$ 1-4Glc $\beta$ 1-PAA                                                                | Glycotech  | 01-021                        |
| Le <sup>e</sup>        | PAA              | Gal $\beta$ 1-3GlcNAc $\beta$ 1-PAA                                                             | Glycotech  | 01-020                        |
| [3'S]Le <sup>e</sup>   | PAA              | (3OSO <sub>2</sub> )Gal $\beta$ 1-3GlcNAc $\beta$ 1-PAA                                         | Glycotech  | 01-062                        |
| LN                     | PAA              | Gal $\beta$ 1-4GlcNAc $\beta$ 1-PAA                                                             | Glycotech  | 01-022                        |
| [3'SLN                 | PAA              | (3OSO <sub>2</sub> )Gal $\beta$ 1-4GlcNAc $\beta$ 1-PAA                                         | Glycotech  | 01-061                        |
| [6'SLN                 | PAA              | Gal $\beta$ 1-4(6OSO <sub>2</sub> )GlcNAc $\beta$ 1-PAA                                         | Glycotech  | 01-066                        |
| [6'SLN                 | PAA              | (6OSO <sub>2</sub> )Gal $\beta$ 1-4GlcNAc $\beta$ 1-PAA                                         | Glycotech  | 01-068                        |
| $\beta$ GalNAc         | PAA              | GalNAc $\beta$ 1-PAA                                                                            | Glycotech  | 01-011                        |
| di-GalNAc $\beta$      | PAA              | GalNAc $\beta$ 1-3GalNAc $\beta$ 1-PAA                                                          | Glycotech  | 01-070                        |
| LDN                    | PAA              | GalNAc $\beta$ 1-4GlcNAc $\beta$ 1-PAA                                                          | Glycotech  | 01-057                        |
| GA2                    | PAA              | GalNAc $\beta$ 1-4Gal $\beta$ 1-4Glc $\beta$ 1-PAA                                              | Glycotech  | 08-074                        |
| Asialo-FET             | Glycoprotein     | Asialo fetuin (Desialylated complex-type N- and O-glycans)                                      | Sigma      | F3004 (Acid-treated)          |
| Asialo-AGP             | Glycoprotein     | Asialo $\alpha$ 1-acid glycoprotein (Desialylated complex-type N-glycans)                       | Sigma      | G9885 (Acid-treated)          |
| Asialo-TF              | Glycoprotein     | Asialo transferrin (Desialylated complex-type N-glycans)                                        | Sigma      | T3309 (Acid-treated)          |
| Asialo-TG              | Glycoprotein     | Asialo porcine thyroglobulin (Desialylated complex-type N-glycans, high-mannose-type N-glycans) | Sigma      | T1126 (Acid-treated)          |
| $\beta$ GlcNAc         | PAA              | GlcNAc $\beta$ -PAA                                                                             | Glycotech  | 01-009                        |
| [6S] $\beta$ GlcNAc    | PAA              | (6OSO <sub>2</sub> )GlcNAc $\beta$ -PAA                                                         | Glycotech  | 01-016                        |
| Agalacto-Fet           | Glycoprotein     | Agalacto fetuin (Agalactosylated complex-type N- and O-glycans)                                 | Sigma      | F3004 (Galactosidase-treated) |
| Agalacto-AGP           | Glycoprotein     | Agalacto $\alpha$ 1-acid glycoprotein (Agalactosylated complex-type N-glycans)                  | Sigma      | G9885 (Galactosidase-treated) |
| Agalacto-TF            | Glycoprotein     | Agalacto transferrin (Agalactosylated complex-type N-glycans, high-mannose-type N-glycans)      | Sigma      | T3309 (Galactosidase-treated) |
| OVm                    | Glycoprotein     | Ovomucoid (Complex-type N-glycans)                                                              | Sigma      | T2011                         |
| OVA                    | Glycoprotein     | Ovoalbumin (Hybrid-type N-glycans)                                                              | Sigma      | A2512                         |
| $\alpha$ Man           | PAA              | Man $\alpha$ 1-PAA                                                                              | Glycotech  | 01-005                        |
| rMan                   | PAA              | Man $\beta$ 1-PAA                                                                               | Glycotech  | 01-050                        |
| [6P]Man                | PAA              | (6OPO <sub>2</sub> )Man $\alpha$ 1-PAA                                                          | Glycotech  | 01-006                        |
| INV                    | Glycoprotein     | Yeast invertase (High mannose-type N-glycans)                                                   | Sigma      | I4504                         |
| Tn                     | PAA              | GalNAc $\beta$ 1-PAA                                                                            | Glycotech  | 01-010                        |
| Core1                  | PAA              | Gal $\beta$ 1-3GalNAc $\alpha$ 1-PAA                                                            | Glycotech  | 08-023                        |
| Core2                  | PAA              | Gal $\beta$ 1-3(GlcNAc $\beta$ 1-6)GalNAc $\alpha$ 1-PAA                                        | Glycotech  | 01-083                        |
| Core3                  | PAA              | GlcNAc $\beta$ 1-3GalNAc $\alpha$ 1-PAA                                                         | Glycotech  | 01-071                        |
| Core4                  | PAA              | GlcNAc $\beta$ 1-3(GlcNAc $\beta$ 1-6)GalNAc $\alpha$ 1-PAA                                     | Glycotech  | 01-089                        |
| Forsman                | PAA              | GalNAc $\beta$ 1-3GalNAc $\alpha$ 1-PAA                                                         | Glycotech  | 01-026                        |
| Core6                  | PAA              | GlcNAc $\beta$ 1-6GalNAc $\alpha$ 1-PAA                                                         | Glycotech  | 01-072                        |
| Core8                  | PAA              | Gal $\alpha$ 1-3GalNAc $\alpha$ 1-PAA                                                           | Glycotech  | 01-028                        |
| [3'S]Core1             | PAA              | (3OSO <sub>2</sub> )Gal $\beta$ 1-3GalNAc $\alpha$ 1-PAA                                        | Glycotech  | 08-069                        |
| Gal $\beta$ -Core3     | PAA              | Gal $\beta$ 1-4GlcNAc $\beta$ 1-3GalNAc $\alpha$ 1-PAA                                          | Glycotech  | 01-116                        |
| Asialo-BSM             | Glycoprotein     | Asialo bovine submaxillary mucin (Tn)                                                           | Sigma      | M3895 (Acid-treated)          |
| Asialo-GP              | Glycoprotein     | Asialo human glycophorin MN (T)                                                                 | Sigma      | A9791 (Acid-treated)          |
| STn                    | PAA              | Neu5Ac $\alpha$ 2-6GalNAc $\alpha$ 1-PAA                                                        | Glycotech  | 01-059                        |
| STn(Gc)                | PAA              | Neu5Gc $\alpha$ 2-6GalNAc $\alpha$ 1-PAA                                                        | Glycotech  | 01-107                        |
| ST                     | PAA              | Neu5Ac $\alpha$ 2-3Gal $\beta$ 1-3GalNAc $\alpha$ 1-PAA                                         | Glycotech  | 01-088                        |
| Sia $\alpha$ 2-6Core 1 | PAA              | Gal $\beta$ 1-3(Neu5Ac $\alpha$ 2-6)GalNAc $\alpha$ 1-PAA                                       | Glycotech  | 01-113                        |
| BSM                    | Glycoprotein     | Bovine submaxillary mucin (Sialyl Tn)                                                           | Sigma      | M3895                         |
| GP                     | Glycoprotein     | Human glycophorin (Disialyl T and sialyl Tn)                                                    | Sigma      | G5017                         |
| $\alpha$ Gal           | PAA              | Gal $\alpha$ 1-PAA                                                                              | Glycotech  | 01-003                        |
| Gal $\alpha$ 1-2Gal    | PAA              | Gal $\alpha$ 1-2Gal $\beta$ 1-PAA                                                               | Glycotech  | 01-056                        |
| Gal $\alpha$ 1-3Gal    | PAA              | Gal $\alpha$ 1-3Gal $\beta$ 1-PAA                                                               | Glycotech  | 01-018                        |
| Gal $\alpha$ 1-3Lac    | PAA              | Gal $\alpha$ 1-3Gal $\beta$ 1-4Glc $\beta$ 1-PAA                                                | Glycotech  | 01-075                        |
| Gal $\alpha$ 1-3LN     | PAA              | Gal $\alpha$ 1-3Gal $\beta$ 1-4GlcNAc $\beta$ 1-PAA                                             | Glycotech  | 01-079                        |
| Gal $\alpha$ 1-4LN     | PAA              | Gal $\alpha$ 1-4Gal $\beta$ 1-4GlcNAc $\beta$ 1-PAA                                             | Glycotech  | 01-110                        |
| Melibiose              | PAA              | Gal $\alpha$ 1-6Glc $\beta$ 1-PAA                                                               | Glycotech  | 01-063                        |
| $\alpha$ Glc           | PAA              | Glc $\alpha$ 1-PAA                                                                              | Glycotech  | 01-001                        |
| $\beta$ Glc            | PAA              | Glc $\beta$ 1-PAA                                                                               | Glycotech  | 01-002                        |
| Maltose                | PAA              | Glc $\alpha$ 1-4Glc $\beta$ 1-PAA                                                               | Glycotech  | 01-054                        |
| HA                     | BSA              | Hyaluronic acid-BSA                                                                             | Seikagaku  | 400720                        |
| CSA                    | BSA              | Chondroitin Sulfate A-BSA                                                                       | Seikagaku  | 400655                        |
| CSB                    | BSA              | Chondroitin Sulfate B-BSA                                                                       | Seikagaku  | 400660                        |
| HS                     | BSA              | Heparan Sulfate-BSA                                                                             | Seikagaku  | 400700                        |
| HP                     | BSA              | Heparin-BSA                                                                                     | Calbiochem | 375095                        |
| KS                     | BSA              | Keratan Sulfate-BSA                                                                             | Seikagaku  | 400760                        |
| $\alpha$ Rha           | PAA              | Rhamnose $\alpha$ 1-PAA                                                                         | Glycotech  | 01-008                        |
| Mannan (SC)            | Glycoprotein     | <i>S. cerevisiae</i> mannan                                                                     | Sigma      | M7504                         |
| Mannan (CA)            | Glycoprotein     | <i>C. albicans</i> mannan                                                                       | Takara     | MG001                         |
| Zyмосan                | Glycoprotein     | Zyмосan                                                                                         | Sigma      | Z4250                         |
| Chitobiose             | PAA              | GlcNAc $\beta$ 1-4GlcNAc $\beta$ 1-PAA                                                          | Glycotech  | 08-057                        |
| BSA                    | Glycoprotein     | -                                                                                               | Sigma      | A7638                         |
| Negative PAA           | PAA              | -                                                                                               | Glycotech  | 01-000                        |

Takahara *et al.* Fig. S1.

Precise information of ligands on the glyco-microarray.
