# Supplementary material
Source: PubMed Central journal article supplement (PMC3347427)
Supplement: supp_80.5.1699_IAI-IAI06308-11-s02.pdf [file supp_80.5.1699_IAI-IAI06308-11-s02.pdf]

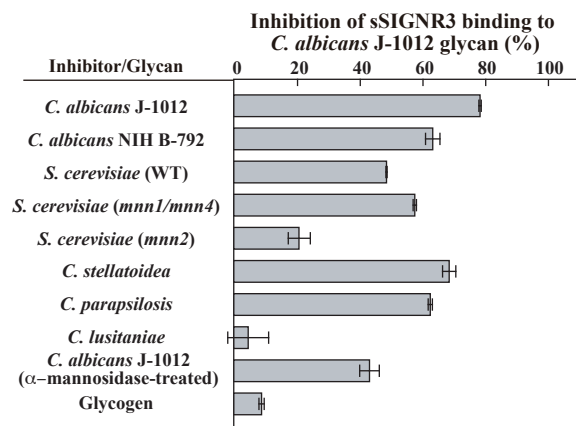

**Takahara *et al.*** Fig. S2.

Inhibition analysis by lectin ELISA. Binding of sSIGNR3 to *C. albicans* J-1012 glycan coated on microtiter plates was analyzed as in Fig. 2A.
